# Supplementary material
Source: PubMed Central journal article supplement (PMC6928437)
Supplement: NIHMS1054061-supplement-Supp_info.pdf [file NIHMS1054061-supplement-Supp_info.pdf]

## **Phosphatidylserine is critical for vesicle fission during clathrin-mediated endocytosis**

*(Running title: PS in vesicle fission during CME)*

Kelly Varga<sup>1,2\*</sup>, Zhongjiao Jiang<sup>1\*</sup>, Liang-Wei Gong<sup>1</sup>

\*: These authors contributed equally to this paper

1: Department of Biological Sciences,

University of Illinois at Chicago,

840 W. Taylor St.,

Chicago, IL 60607

2: Department of Biological Sciences,

University of North Texas at Dallas,

7300 University Hills Blvd.,

Dallas, TX 75241

## Supplementary results

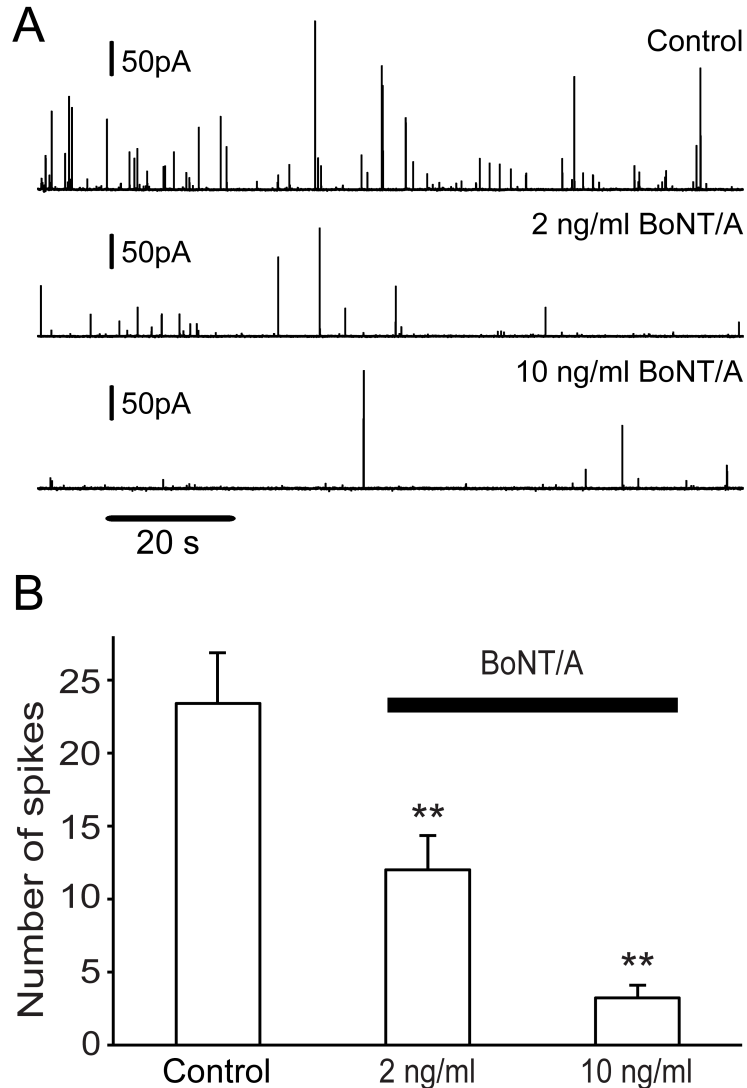

**Fig. S1.** Treatments with BoNT/A, which cleaves the last 9 amino acids of SNAP-25 c-terminus, inhibited exocytosis in chromaffin cells using carbon fiber amperometry. **A.** Representative amperometric traces in a control cell (*top*), cells with a 45-min incubation of BoNT/A at a concentration of either 2 (*middle*), or 10 ng/ml (*bottom*). **B.** Quantifications show that BoNT/A treatments reduced the number of amperometrical spikes in a concentration dependent manner

(Control:  $23.4 \pm 3.47$ ,  $n = 18$  cells, 2 ng/ml BoNT/A:  $12.0 \pm 2.36$ ,  $n = 18$  cells, 10 ng/ml BoNT/A:  $3.2 \pm 0.81$ ,  $n = 18$  cells; one-way ANOVA followed by Tukey's post hoc test,  $F_{(2,51)} = 17.7513$ , \*\*\*  $p < 0.0001$ , control vs. 2 ng/ml BoNT/A: \*\*  $p = 0.0042$ , control vs. 10 ng/ml BoNT/A: \*\*  $p = 0.0010$ ). Data was collected from 4 independent cultures.

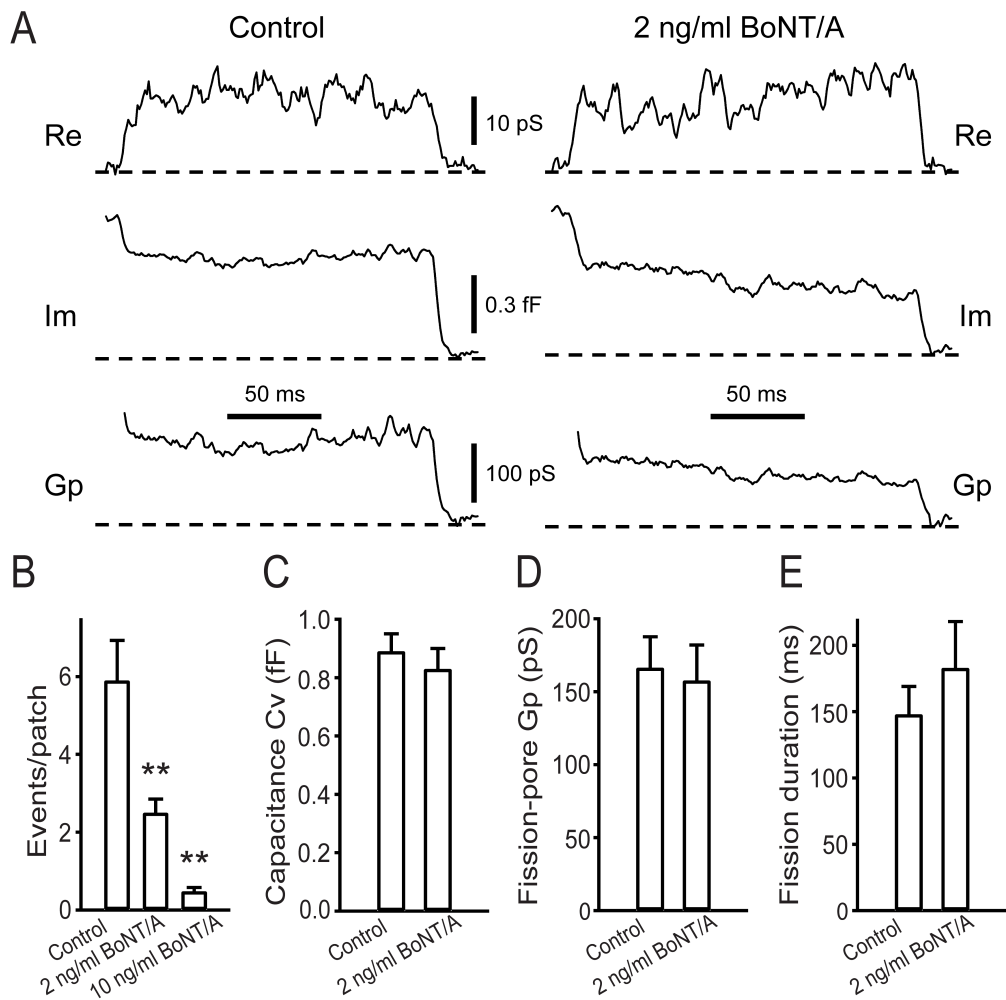

**Fig. S2.** The treatment of BoNT/A at 2 ng/ml had no obvious effect on the fission-pore duration using cell-attached capacitance recordings. **A.** Representative endocytic events, as membrane

conductance (Re), membrane capacitance (Im) and the fission-pore conductance (Gp) recorded in the cell-attached configuration at 2 mM  $[Ca^{2+}]_e$  from control cells (left) or cells treated with BoNT/A (right). **B.** The number of endocytic events within the first 5 min time of cell-attached recordings was significantly reduced by BoNT/A in a concentration dependent manner (Control:  $5.90 \pm 1.03$ , n = 86 cells, 2 ng/ml BoNT/A:  $2.50 \pm 0.35$ , n = 108 cells, 10 ng/ml BoNT/A:  $0.48 \pm 0.10$ , n = 87 cells; one-way ANOVA followed by Tukey's post hoc test,  $F_{(2, 278)} = 20.3879$ , \*\*\* p < 0.0001, control vs. 2 ng/ml BoNT/A: \*\* p = 0.001056, control vs. 10 ng/ml BoNT/A: \*\* p = 0.001043). **C-E.** The capacitance Cv of endocytic vesicles (Control:  $0.89 \pm 0.06$ , n = 43 events, 2 ng/ml BoNT/A:  $0.83 \pm 0.07$ , n = 41 events; unpaired Student's t-test,  $t_{(82)} = 0.5542$ , p = 0.5809) (C), the fission-pore Gp (Control:  $166.4 \pm 21.2$ , n = 43 events, 2 ng/ml BoNT/A:  $157.7 \pm 24.3$ , n = 41 events; unpaired Student's t-test,  $t_{(82)} = 0.3657$ , p = 0.7155) (D), and the fission-pore duration (Control:  $148.1 \pm 21.2$ , n = 42 events, 2 ng/ml BoNT/B:  $183.0 \pm 35.2$ , n = 41 events; unpaired Student's t-test,  $t_{(82)} = 0.8673$ , \* p = 0.3883) (E) were statistically comparable among these 3 groups. Data was collected from 4 independent cultures.

|         | No. of events | Amplitude pA    | Half-width ms      | Quantal size pC | 50-90% rise time ms | Foot duration ms  |
|---------|---------------|-----------------|--------------------|-----------------|---------------------|-------------------|
| Control | 421           | $46.5 \pm 2.53$ | $6.78 \pm 0.26$    | $0.42 \pm 0.03$ | $0.92 \pm 0.07$     | $3.05 \pm 0.26$   |
| BoNT/A  | 249           | $41.0 \pm 2.70$ | $8.58 \pm 0.42$ ** | $0.41 \pm 0.03$ | $1.02 \pm 0.09$     | $3.87 \pm 0.37$ * |

**Table. S1.** Effects of BoNT/A at 2 ng/ml on kinetics of single amperometric spikes. While the quantal size, peak amplitude and 50-90% rise time remained unaltered, the half-width ( $t_{(668)} =$

2.8577,  $p = 0.0044$ ) and foot duration (Control:  $n = 255$ ; BoNT/A:  $n = 166$ ;  $t_{(419)} = 2.0549$ ,  $p = 0.0405$ ) were significantly increased by 2 ng/ml BoNT/A. Data are presented as mean  $\pm$  SEM of individual events for each parameter. Data was collected from 4 independent cultures.
